# Supplementary material
Source: bioRxiv or medRxiv preprint supplement (https://medrxiv.org/highwire/filestream/90080/field_highwire_adjunct_files/0/2020.07.16.20155481-1.pdf)
Supplement: Supplementary file [file 2020.07.16.20155481-1.pdf]

# Supporting Information

Marie-Line Andreola<sup>a</sup>, Frédéric Becquart<sup>b</sup>, Wahbi Jomaa<sup>c</sup>, Paul O. Verhoeven<sup>d</sup>, Gérard Baldacchino<sup>e</sup>, Simon Hemour<sup>f</sup>, and D-Mask consortium

<sup>a</sup>Université de Bordeaux, MFP, CNRS UMR 5234, 146 rue Léo Saignat, 33076 Bordeaux Cedex, France ; UB'L3 TBM core, Bordeaux.

<sup>b</sup>Université de Lyon, CNRS, UMR 5223, Ingénierie des Matériaux Polymères, Université Jean Monnet, 42023 Saint-Etienne, France

<sup>c</sup>Université de Bordeaux, CNRS UMR 5295, I2M Bordeaux, 351 cours de la Libération, 33400 Talence, France

<sup>d</sup>GIMAP EA 3064 (Groupe Immunité des Muqueuses et Agents Pathogènes), University of Lyon, 42023 Saint-Etienne, France ; Laboratory of Bacteriology-Virology-Hygiene, University hospital of Saint-Etienne, 42055 Saint-Etienne Cedex 02, France

<sup>e</sup>Université Paris-Saclay, CEA, CNRS, Laboratoire Interactions, Dynamique et Lasers (LIDYL) - 91191 Gif-sur-Yvette, France

<sup>f</sup>Université de Bordeaux, CNRS UMR 5218, Bordeaux INP, IMS, 351 cours de la Libération, 33400 Talence, France

## SI Materials and Methods

### For inactivation test I conducted at MFP lab:

- Hygroscopic material: Panzani "coquillettes 8min."
- Face Mask used during measurement: cloth mask #1-3 "Boldo'R"
- Microwave oven: Hitachi, MSO23 model, microwave power rated as of 800W
- temperature measurement (Fig. 1-A): the sensors (thermocouples, K type) were sewn on the outer side of the cloth mask (Data "Top" and "Bottom"), and sewn in the fold of the mask lying flat (Data "Core")

### For Inactivation test II conducted at GIMAP lab:

- Hygroscopic material: Barilla "coquillettes 7 min."
- Face Mask used during measurement: cloth mask #4 "Boldo'R"
- Microwave oven: Whirlpool, model MWD 201/WH microwave power rated as of 700W
- temperature measurement (Fig. 1-A): the sensors (Thermo Buttons 22T) were introduced within the three fabric layers of the cloth mask. Data "Top" corresponds to the interspace between the top and middle layer, data "Bottom" corresponds to the interspace between the middle and the bottom layer, and data "Core" corresponds to the interspace upper interspace at the location of the fold.

### Measurements of Figure 1-B

- Hygroscopic material: Lustucru "coquillettes 3 min."
- Microwave oven (Custom multimode cavity without rotating platform exited by a Sairem magnetron) microwave power set to 850W.
- temperature measurement: the sensor (Fiber Optic Thermometer, Omega company) was introduced within hygroscopic material stack.

## D-Mask consortium

University of Bordeaux / Bordeaux INP / CNRS Aquitaine Faculty and Staff Research Team

Jean-Marc André, PhD  
Marie-Line Andreola, PhD  
Florent Arnal, MS  
Corinne Dejous, PhD  
Luc Dumas-Laussinotte (Undergrad. Research Assistant)  
Benjamin Filio (Undergrad. Research Assistant)  
Simon Hemour, PhD  
Wahbi Jomaa, PhD  
Jean-Luc Lachaud, MS  
Didier Lasseux, PhD  
Anne Lehmans, PhD  
Véronique Lespinet-Najib, PhD  
Vincent Liquète, PhD  
Rachid Malti, PhD  
Mathieu Métiéfiot, PhD  
Maxime Morisset (Undergrad. Research Assistant)  
Patricia Recordon-Pinson, PhD  
Lilian Portex (Undergrad. Research Assistant)

CEA (Alternative Energies and Atomic Energy Commission)

Gérard Baldacchino, PhD  
Floriane Carpentier, BS  
Sylvie Chevillard, PhD  
Stéphane Esnouf, PhD  
Thomas Gustavsson, PhD  
Carole Marchand, PhD  
Elizabeth Zekri, PhD

Museum National d'histoire Naturelle; Sorbonne University

Lydia Detienne, MS  
Anne Dozieres, PhD  
Romain Julliard, PhD  
Alicia Mansilla Sanchez, MS  
Laure Turcati, PhD

University of St Etienne

Frédéric Becquart, PhD  
Thomas Bourlet, PharmD, PhD  
Paul O. Verhoeven, MD, PhD

Atelier Micro-ondes et Matériaux Bordeaux

Gilles Ruffié, PhD  
Fabrice Bonnaudin, MS

Institut de Radioprotection et de Sûreté Nucléaire

François-Xavier Ouf, PhD  
Victor Mocho, PhD  
Soleiman Bourrous, PhD  
Mathieu Barrault, DUT  
Stéphane Poirier, DUT

Groupe Boldoduc

Jean Charles Potelle, MBA  
Alice Josserand, MS

Picard Next Emballage

Sébastien Dutot, MS

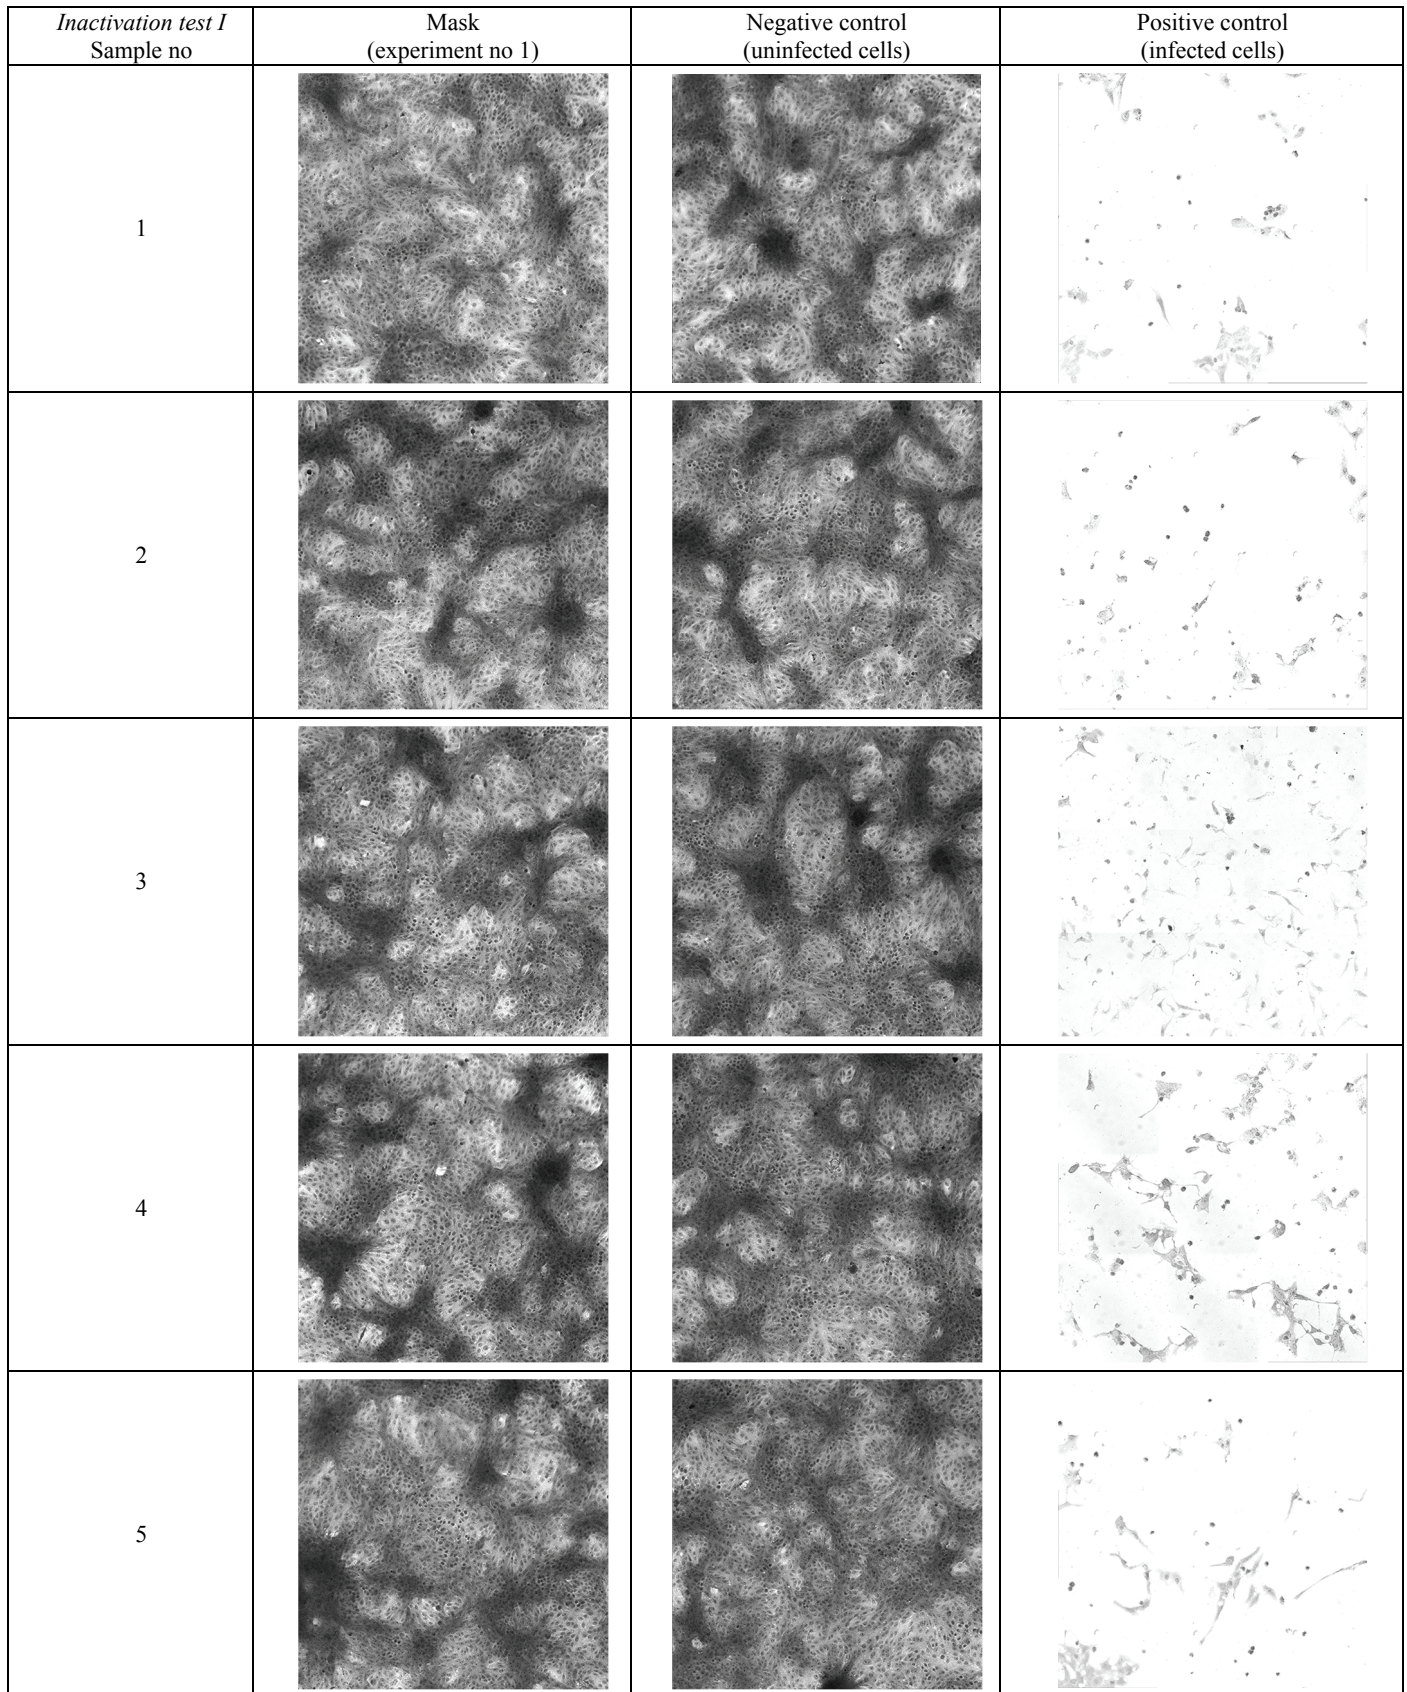

**Figure S1.** VeroE6 cells at day 6 post infection. VeroE6 cells inoculated with SARS-CoV-2 recovered from paper discs after heat-inactivation (mask #1). VeroE6 growth with complete medium (negative control). VeroE6 cells inoculated with SARS-CoV-2 recovered from paper discs without heat-inactivation (positive control).

**Methods.** A 25  $\mu$ L-volume of viral suspension (5.13 log TCID<sub>50</sub>/ml) was loaded onto paper disc of 6 mm-diameter and dry at RT for 10 min. Five paper discs were placed in the folds of the mask. The mask and paper discs were put in the box to be heat-treated for 20 min. For positive control paper discs were incubated at RT for 20 min. Paper disc were then eluted in 225  $\mu$ L of fresh medium in order to recover SARS-CoV-2. A 100  $\mu$ L-volume of this latter suspension was seeded onto confluent Vero E6 cells. Cells were incubated for 6 days at 37°C with 5% CO<sub>2</sub>. Cytopathic effect was assess by microscopic observation in BSL3. Cells were fixed with PFA 4% during 20 min and stained for being imaged in BSL2. Images were acquired at 40x magnification. Each image correspond to 9 merged fields which cover approximately 0.95 mm<sup>2</sup>.

| <i>Inactivation test I</i><br>Sample no | Mask<br>(experiment no 2)                                                           | Negative control<br>(uninfected cells)                                               | Positive control<br>(infected cells)                                                  |
|-----------------------------------------|-------------------------------------------------------------------------------------|--------------------------------------------------------------------------------------|---------------------------------------------------------------------------------------|
| 1                                       | 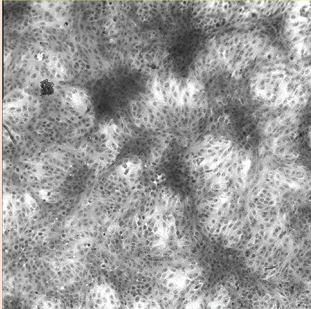   |    |    |
| 2                                       |    |    |    |
| 3                                       |   |   |   |
| 4                                       |  |  |  |
| 5                                       |  |  |  |

(image selected for the brief report are highlighted in orange)

**Figure S2.** VeroE6 cells at day 6 post infection. VeroE6 cells inoculated with SARS-CoV-2 recovered from paper discs after heat-inactivation (mask #2). VeroE6 growth with complete medium (negative control). VeroE6 cells inoculated with SARS-CoV-2 recovered from paper discs without heat-inactivation (positive control).

**Methods.** A 25  $\mu$ L-volume of viral suspension (5.13 log TCID<sub>50</sub>/ml) was loaded onto paper disc of 6 mm-diameter and dry at RT for 10 min. Five paper discs were placed in the folds of the mask. The mask and paper discs were put in the box to be heat-treated for 20 min. For positive control paper discs were incubated at RT for 20 min. Paper disc were then eluted in 225  $\mu$ L of fresh medium in order to recover SARS-CoV-2. A 100  $\mu$ L-volume of this latter suspension was seeded onto confluent Vero E6 cells. Cells were incubated for 6 days at 37°C with 5% CO<sub>2</sub>. Cytopathic effect was assess by microscopic observation in BSL3. Cells were fixed with PFA 4% during 20 min and stained for being imaged in BSL2. Images were acquired at 40x magnification. Each image correspond to 9 merged fields which cover approximately 0.95 mm<sup>2</sup>.

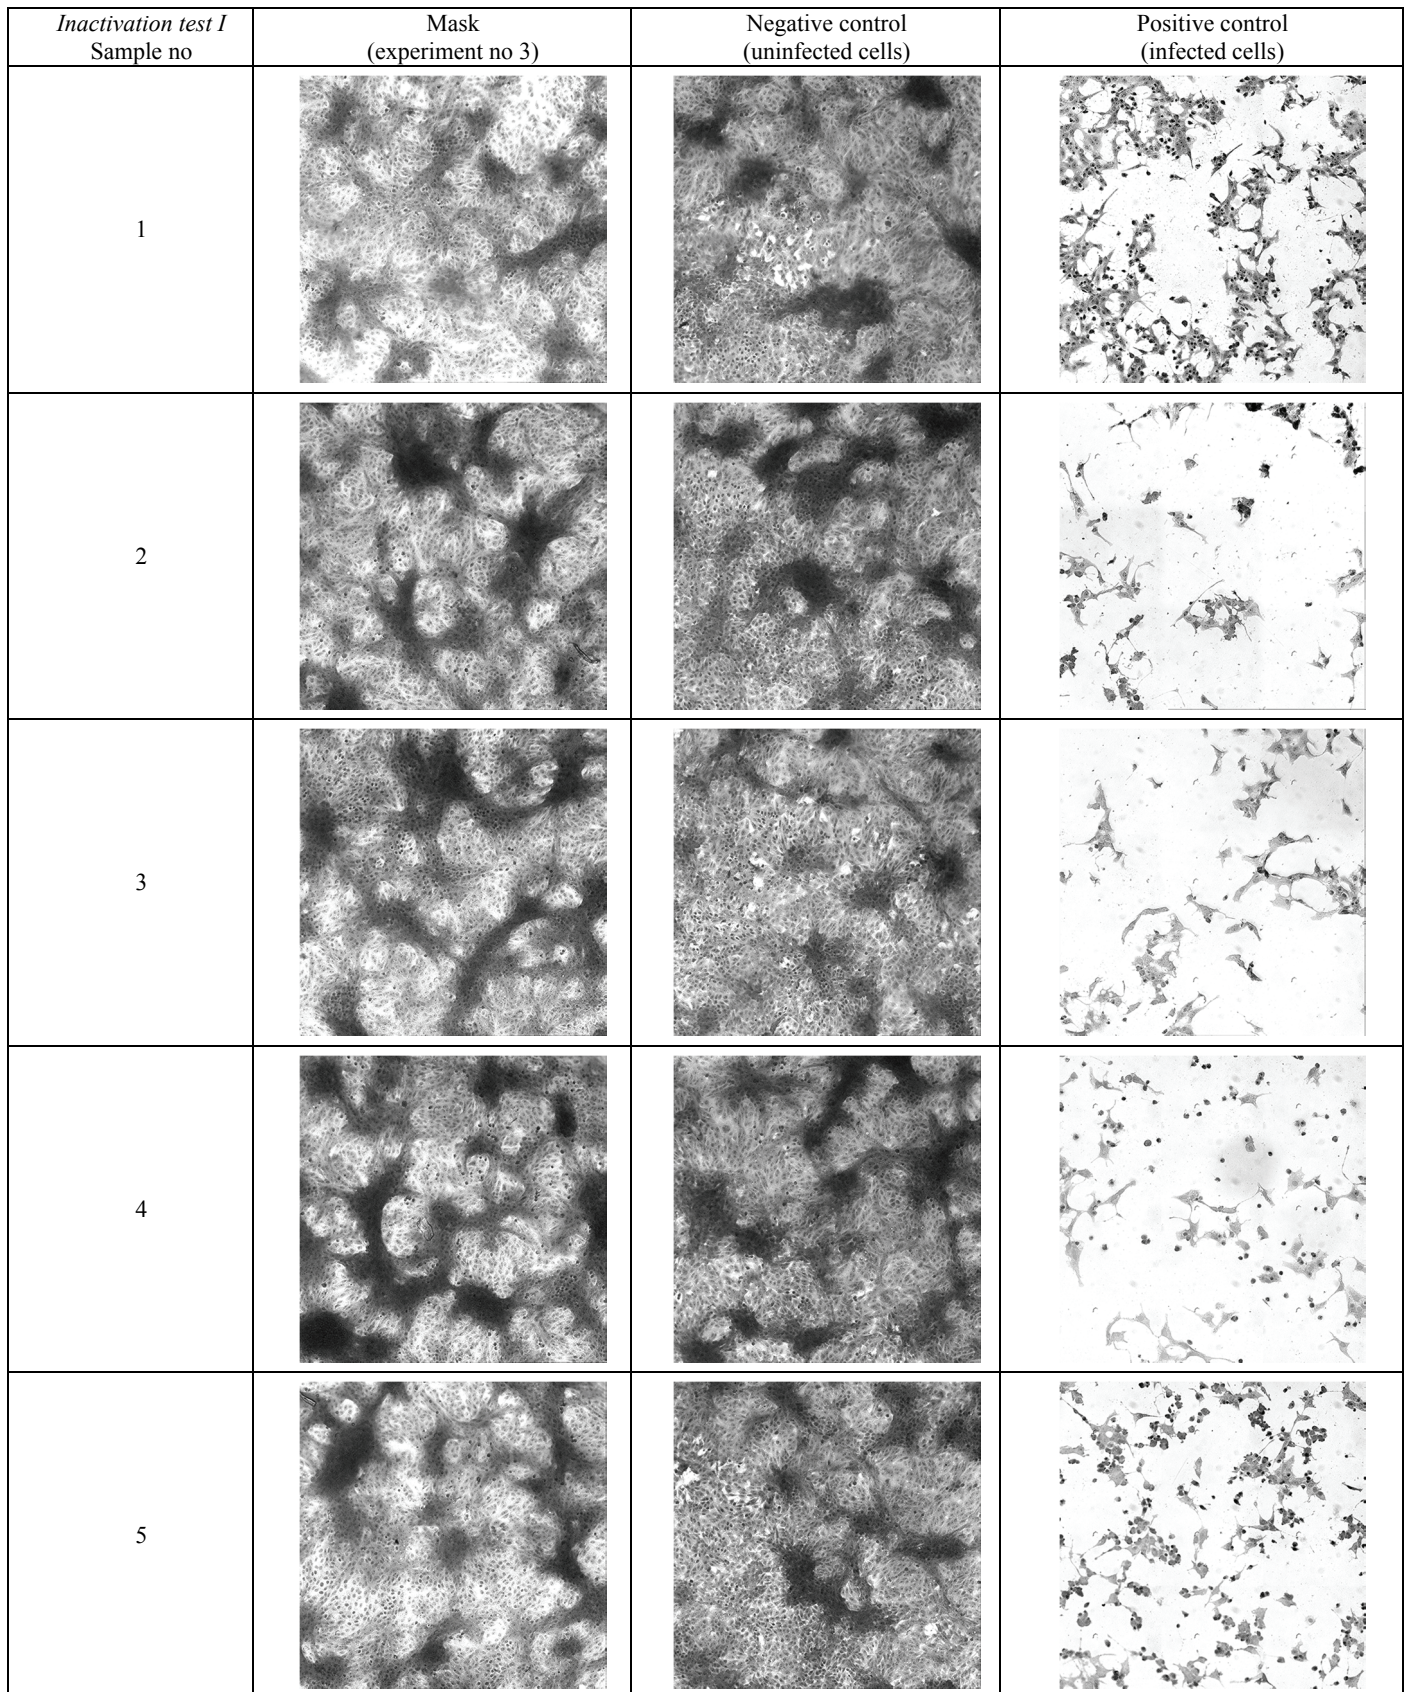

**Figure S3.** VeroE6 cells at day 6 post infection. VeroE6 cells inoculated with SARS-CoV-2 recovered from paper discs after heat-inactivation (mask #3). VeroE6 growth with complete medium (negative control). VeroE6 cells inoculated with SARS-CoV-2 recovered from paper discs without heat-inactivation (positive control).

**Methods.** A 25  $\mu$ L-volume of viral suspension (5.13 log TCID<sub>50</sub>/ml) was loaded onto paper disc of 6 mm-diameter and dry at RT for 10 min. Five paper discs were placed in the folds of the mask. The mask and paper discs were put in the box to be heat-treated for 20 min. For positive control paper discs were incubated at RT for 20 min. Paper disc were then eluted in 225  $\mu$ L of fresh medium in order to recover SARS-CoV-2. A 100  $\mu$ L-volume of this latter suspension was seeded onto confluent Vero E6 cells. Cells were incubated for 6 days at 37°C with 5% CO<sub>2</sub>. Cytopathic effect was assess by microscopic observation in BSL3. Cells were fixed with PFA 4% during 20 min and stained for being imaged in BSL2. Images were acquired at 40x magnification. Each image correspond to 9 merged fields which cover approximately 0.95 mm<sup>2</sup>.

| <i>Inactivation test II</i><br>Day | VERO cells                                                                         | Negative control<br>(uninfected cells)                                              | Positive control<br>(infected cells)                                                 |
|------------------------------------|------------------------------------------------------------------------------------|-------------------------------------------------------------------------------------|--------------------------------------------------------------------------------------|
| Day 0                              |   |                                                                                     |                                                                                      |
| Day 2                              |                                                                                    |   |   |
| Day 7                              |  |  |  |

| <i>Inactivation test II</i><br>Day | Sample no 1<br>(experiment no 4)                                                    | Sample no 2<br>(experiment no 4)                                                     | Sample no 3<br>(experiment no 4)                                                      |
|------------------------------------|-------------------------------------------------------------------------------------|--------------------------------------------------------------------------------------|---------------------------------------------------------------------------------------|
| Day 2                              | 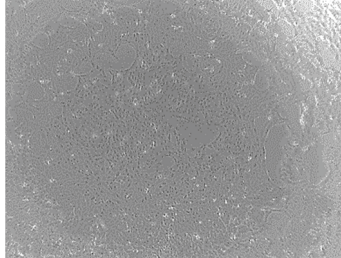 |  |  |
| Day 7                              |  |  |  |

(image selected for the brief report are highlighted in orange)

**Figure S4** VeroE6 cells at day 2 and 7 post infection. VeroE6 cells inoculated with SARS-CoV-2 recovered from paper discs after heat-inactivation (mask #4). VeroE6 growth with complete medium (VERO cells). Uninfected VeroE6 cells with paper discs after heat-inactivation (Negative control). VeroE6 cells inoculated with SARS-CoV-2 recovered from paper discs without heat-inactivation (positive control).

**Methods.** A 25  $\mu$ L-volume of viral suspension (4.84 log TCID<sub>50</sub>/ml) was loaded onto paper disc of 6 mm-diameter and dried at RT for 10 min. Paper discs were placed in the folds of the mask. The mask and paper discs were put in the box to be heat-treated for 15 min. For positive control paper discs were incubated at RT for 15 min. Paper discs were then eluted in 500  $\mu$ L of fresh medium in order to recover SARS-CoV-2. A 400  $\mu$ L-volume of this latter suspension was seeded onto Vero E6 cells. Cells were incubated for 7 days at 37°C with 5% CO<sub>2</sub>. Cytopathic effect was assessed by microscopic observation in BSL3.

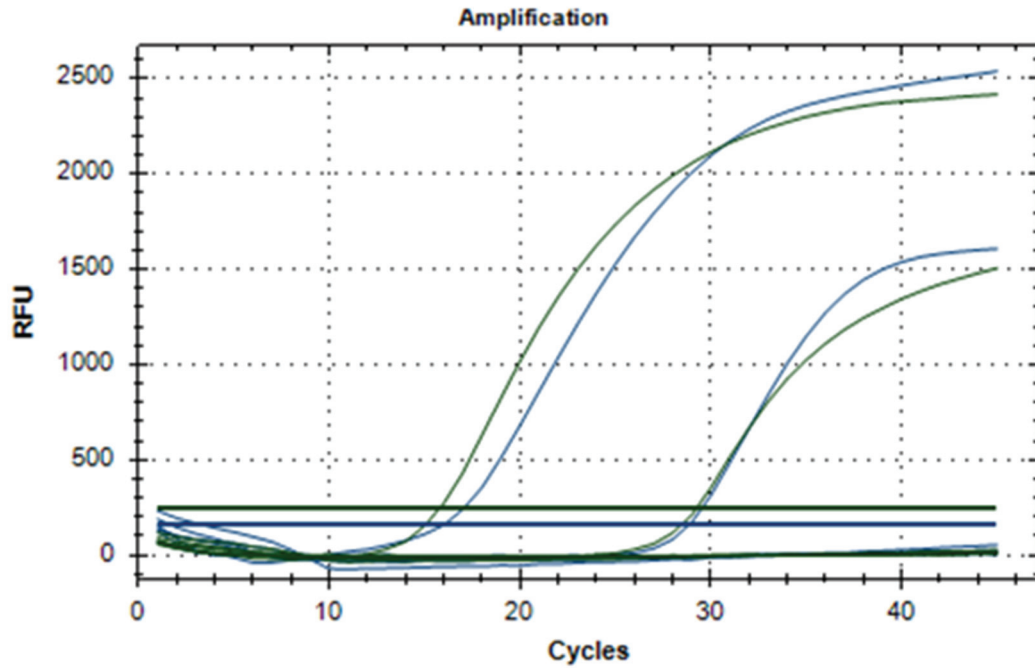

**Figure S5** qRT-PCR amplification of viral RNA Methods from the experiment shown in Fig. S4. After centrifugation, 200  $\mu$ l of supernatant were extracted using the « High Pure Viral Nucleic Acid » kit from Roche following the supplier's recommendations. qRT-PCR was performed following indications of the supplier (SARS-CoV-2 RT-qPCR Perkin Elmer). Briefly, 6  $\mu$ l of reactional mix were mixed with 14  $\mu$ l of a 1/10 dilution of each sample. Amplification of positive and negative controls supplied in the kit were also performed. Two viral genes, ORF1ab-gene and N-gene, were targeted. According to the supplier, Ct  $\leq$ 32 for ORF1ab or  $\leq$ 35 for N-gene are considered as positive. Ct  $\geq$ 40 or undetermined are negative. Figure S5 presents a representative experiment of qRT-PCR. Supernatant of cells infected with positive control (untreated virus) were positive with Ct of 15.80 and 16.10 for ORF1ab-gene and N-gene respectively. All other samples, uninfected cells, cells infected with heat treated samples, negative control of the kit, were undetected. Positive controls of the kit is detected with Ct  $\leq$ 32 as expected : 29.25 for of ORF1ab and 28.92 for N-gene.
